# Supplementary material for: The Study of Angptl4-Modulated Podocyte Injury in IgA Nephropathy
Source: Frontiers journal article supplement (doi:10.3389/fphys.2020.575722), 2021-02-11
Supplement: Table_1.DOCX [file Table_1.DOCX]

**Table 1.** Characteristics of individuals included in the study

|  | IgAN | |  |
| --- | --- | --- | --- |
|  | IgAN+PI (n = 37) | IgAN-PI (n = 34) | Control (n = 61) |
| Age (years) | 42.89±1.78 | 45.44±2.15 | 45.49±1.29 |
| Sex (male/female) | 23/14 | 20/14 | 45/16 |
| Serum albumin (g/L) | 35.20±0.98* | 37.89±1.25* | 44.26±0.26 |
| Scr (μmol/L） | 187.22±20.61* | 95.94±5.97* | 72.92±1.30 |
| 24 UP (g/day) | 3.06±0.40 | 1.35±0.48 |  |
| P/C (g/g) | 1.23±0.26 | 1.60±0.35 |  |

Scr, serum creatinine; 24UP, 24-hour urine protein excretion; P/C, protein: creatinine ratio.

The data are shown as the mean ± SEM. *P < 0.05 versus the control.
